# Supplementary material
Source: PubMed Central journal article supplement (PMC4019099)
Supplement: JVI.00365-14_zjv999098978so1.pdf [file JVI.00365-14_zjv999098978so1.pdf]

| ID         | Fold Reduction (log10) <sup>1</sup> | IC <sub>50</sub> (luciferase) <sup>2</sup> | IC <sub>80</sub> (luciferase) <sup>2</sup> | CC50 <sup>3</sup> | structure                                                                             |
|------------|-------------------------------------|--------------------------------------------|--------------------------------------------|-------------------|---------------------------------------------------------------------------------------|
| SKI-417616 | >3.50                               | 1.20                                       | 7.41                                       | 43.2              | 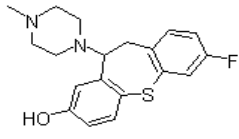   |
| SKI-187714 | 2.36                                | 0.69                                       | 3.51                                       | 39.8              |    |
| SKI-417596 | 2.06                                | 0.86                                       | 4.02                                       | 34.3              |    |
| SKI-205384 | 2.06                                | 1.06                                       | 7.64                                       | 29.7              |   |
| SKI-206312 | 1.88                                | 0.74                                       | 3.68                                       | 24.5              |  |
| SKI-187421 | 1.88                                | 1.17                                       | 6.48                                       | 29.6              |  |
| SKI-185915 | 1.76                                | 1.56                                       | 6.82                                       | >64               |  |
| SKI-174791 | 1.66                                | 12.14                                      | >20                                        | >64               |  |

|            |      |      |       |      |                                                                                       |
|------------|------|------|-------|------|---------------------------------------------------------------------------------------|
| SKI-417710 | 1.58 | 1.12 | 9.62  | 41.0 | 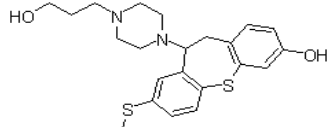   |
| SKI-186534 | 1.58 | 7.32 | >20   | 48.8 |    |
| SKI-206305 | 1.46 | 0.83 | 3.82  | 41.9 |    |
| SKI-205398 | 1.46 | 0.85 | 3.23  | 18.1 |     |
| SKI-207597 | 1.46 | 1.25 | 10.21 | 21.0 |   |
| SKI-417759 | 1.41 | 9.72 | >20   | >64  |  |
| SKI-417672 | 1.36 | 2.12 | 11.40 | 51.6 |   |
| SKI-207595 | 1.32 | 0.80 | 5.65  | 16.4 |  |

|            |      |      |       |      |                                                                                       |
|------------|------|------|-------|------|---------------------------------------------------------------------------------------|
| SKI-417613 | 1.25 | 0.98 | 4.46  | 51.1 | 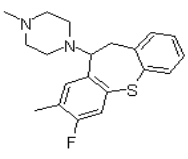   |
| SKI-207613 | 1.25 | 1.11 | 4.18  | 42.3 |    |
| SKI-201730 | 1.22 | 1.79 | 9.49  | >64  |    |
| SKI-373327 | 1.19 | 0.69 | 3.21  | 41.5 |    |
| SKI-417609 | 1.19 | 0.81 | 3.43  | 28.7 |   |
| SKI-206262 | 1.13 | 1.93 | 12.76 | >64  |  |
| SKI-206307 | 1.11 | 1.25 | 5.20  | 16.0 |  |
| SKI-417645 | 1.11 | 1.82 | 6.88  | >64  |  |

|            |      |      |       |      |                                                                                       |
|------------|------|------|-------|------|---------------------------------------------------------------------------------------|
| SKI-174388 | 1.08 | 0.70 | 2.99  | 29.2 | 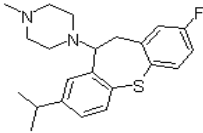   |
| SKI-417614 | 0.95 | 2.25 | 8.72  | 20.6 |    |
| SKI-201689 | 0.86 | 4.56 | >20   | >64  |    |
| SKI-206609 | 0.82 | 2.02 | 13.59 | 42.6 |    |
| SKI-206310 | 0.81 | 0.95 | 3.59  | >64  |  |
| SKI-195201 | 0.76 | 1.96 | 7.09  | 32.5 |   |
| SKI-417603 | 0.65 | 2.00 | 8.61  | >64  |  |
| SKI-417702 | 0.13 | 1.62 | 5.36  | >64  |  |

|            |   |      |      |     |                                                                                     |
|------------|---|------|------|-----|-------------------------------------------------------------------------------------|
| SKI-187420 | 0 | 1.01 | 5.37 | >64 | 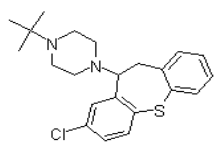 |
|------------|---|------|------|-----|-------------------------------------------------------------------------------------|

Supplementary table 1: Structures and activity of DHBTs.

<sup>1</sup> Fold reduction: HEK293 cells were treated with 10  $\mu$ M compound and infected with DENV-2 (NGC) at moi= 0.1 pfu/cell. Virus was harvested from culture supernatant at 3 d pi. Value given is  $\log_{10}(\text{titer}_{\text{DMSO treated}} / \text{titer}_{\text{compound treated}})$ .

<sup>2</sup> IC<sub>50</sub> and IC<sub>80</sub> were calculated from inhibition of luciferase activity using DENV-2Luc virus as described in Materials and Methods.

<sup>3</sup> CC<sub>50</sub> was calculated using Cell-Titer Glo reagent as described in Materials and Methods
